# Supplementary material for: Association of Lifestyle Factors and Neuropsychological Development of 4-Year-Old Children
Source: MDPI journal article supplement (doi:10.3390/ijerph17165668), 2020-08-05
Supplement: s1 [file s1]

**Table S1.** Estimated correlation between lifestyle factors.

| Lifestyle Factors  | TV (<7 Hours/Week) | Sleep (>70 Hours/Week) | Physical Activity (> Median METs of Cohort) | aMEDKID (>3 Points) |
|--------------------|--------------------|------------------------|---------------------------------------------|---------------------|
| TV                 | -                  | -                      | -                                           | -                   |
| Sleep              | 0.1599 *           | -                      | -                                           | -                   |
| PA                 | -0.0595            | 0.0104                 | -                                           | -                   |
| aMed diet          | 0.1799             | 0.1386 *               | 0.0305                                      | -                   |
| VIF (collinearity) | 1.02               | 1.02                   | 1.00                                        | 1.02                |

\* Statistically significant ( $p < 0.001$ ). Tetrachoric correlation, Binary variables made by recommended value or median specific (PA).

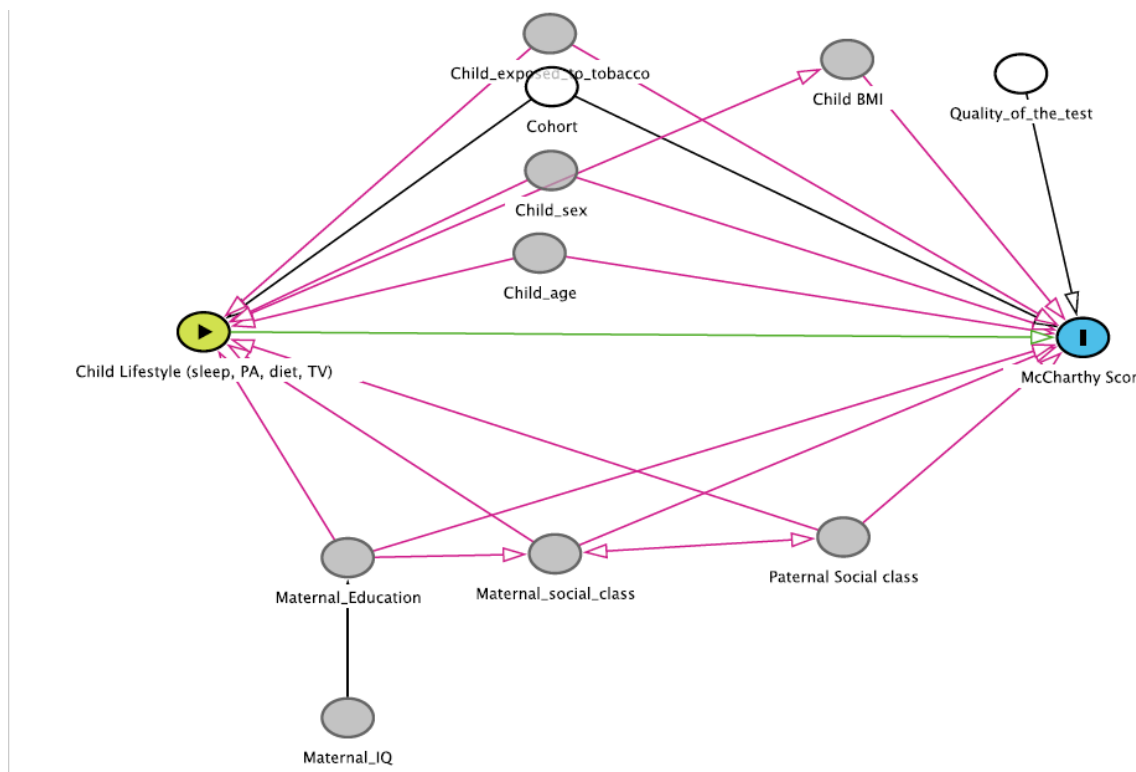

**Figure S1.** DAG model for confounding variable selection.
